# Supplementary material for: Gene expression of benthic amphipods (genus: Diporeia) in relation to a circular ssDNA virus across two Laurentian Great Lakes
Source: PubMed Central journal article supplement (PMC5621510; doi:10.7717/peerj.3810), 2017-09-26

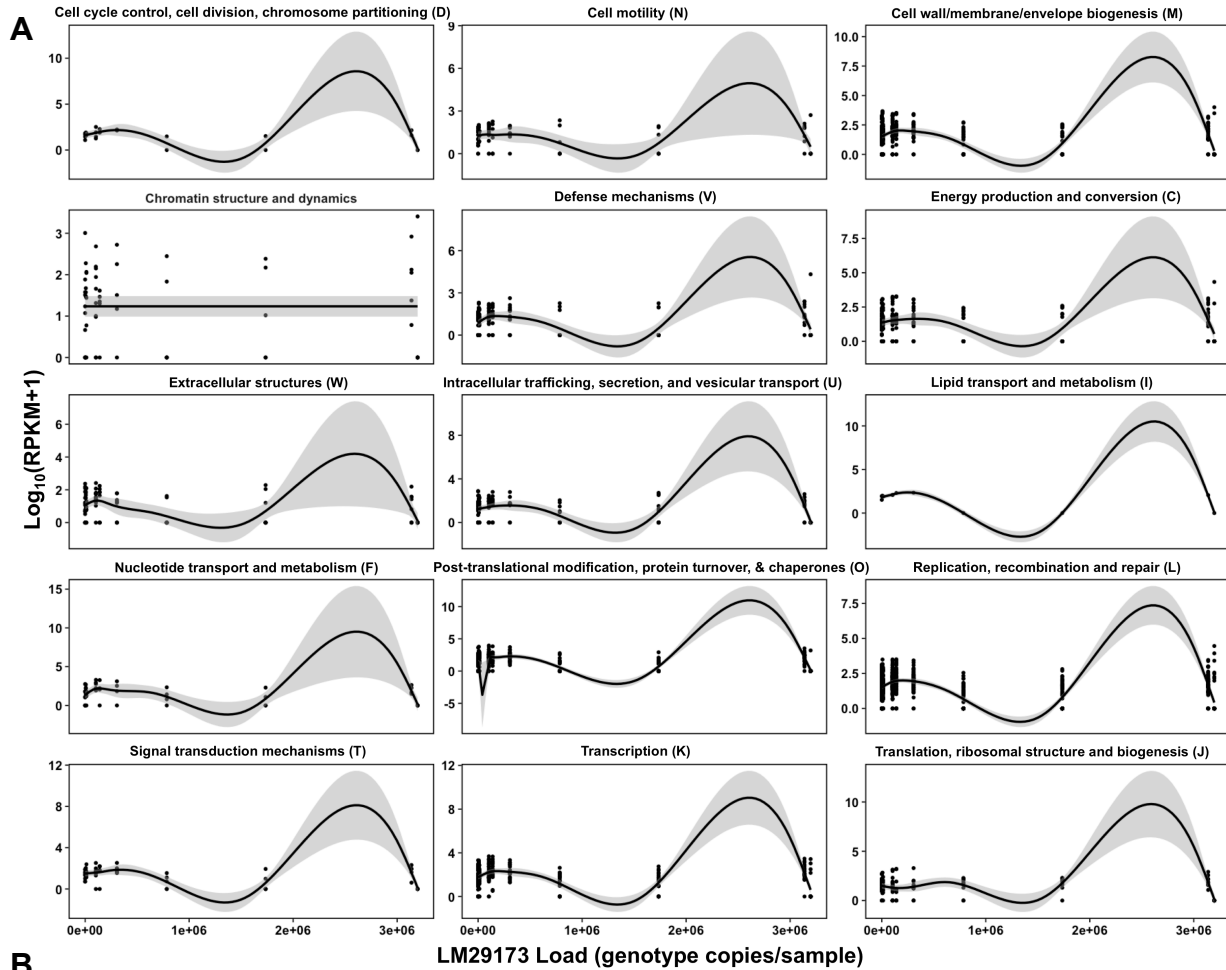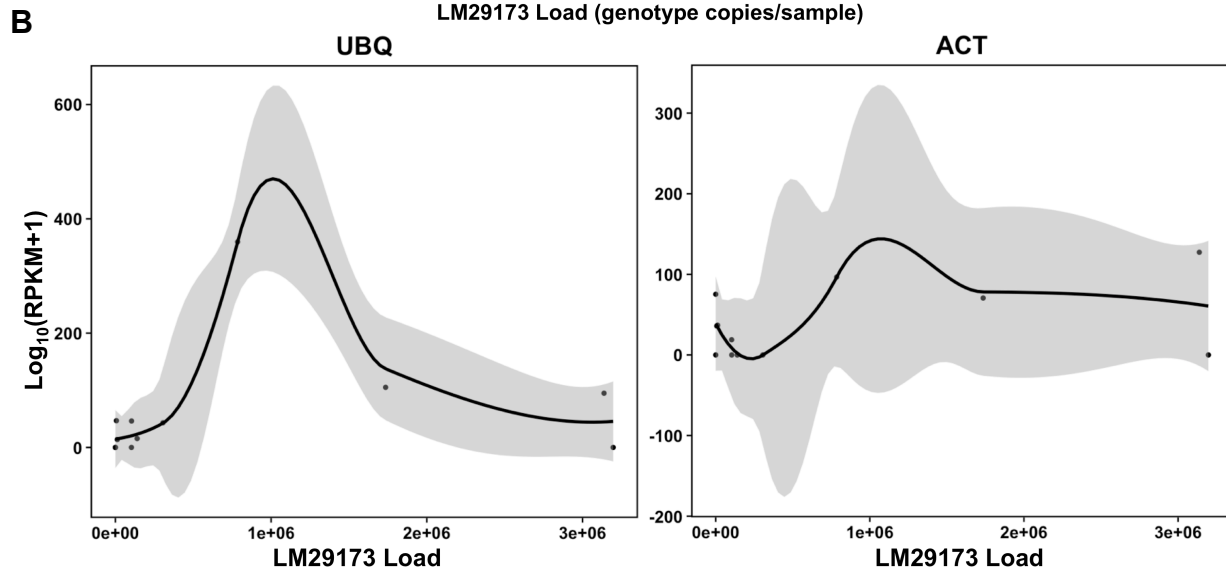

Supplement: peerj-05-3810-s004.pdf [file peerj-05-3810-s004.pdf]
