# Supplementary material for: Gene expression of benthic amphipods (genus: Diporeia) in relation to a circular ssDNA virus across two Laurentian Great Lakes
Source: PubMed Central journal article supplement (PMC5621510; doi:10.7717/peerj.3810), 2017-09-26
Supplement: peerj-05-3810-s006.pdf [file peerj-05-3810-s006.pdf]

|               |               |                                   |                  |                                                      |                | row min                                      | row max   |                                   |  |
|---------------|---------------|-----------------------------------|------------------|------------------------------------------------------|----------------|----------------------------------------------|-----------|-----------------------------------|--|
| A             |               | <b>Contig ID</b>                  | <b>Accession</b> | <b>Putative Function</b>                             | <b>E-value</b> | <b>Host</b>                                  |           |                                   |  |
|               |               | DN7143c1g1i1                      | XP392454.2       | alpha-1-inhibitor 3                                  | 8.000e-19      | <i>Apis mellifera</i>                        |           |                                   |  |
|               |               | DN37192c0g1i1                     | XP392454.2       | alpha-1-inhibitor 3                                  | 4.000e-9       | <i>Apis mellifera</i>                        |           |                                   |  |
|               |               | DN10758c0g1i3                     | AIZ03630.1       | cactin                                               | 3.000e-7       | <i>Litopenaeus vannamei</i>                  |           |                                   |  |
|               |               | DN19783c0g1i1                     | AJD07838.1       | calcineurin subunit A                                | 2.000e-7       | <i>Eriocheir sinensis</i>                    |           |                                   |  |
|               |               | DN8923c0g1i1                      | AGS12619.1       | NF-kB                                                | 0.000003       | <i>Tigriopus japonicus</i>                   |           |                                   |  |
|               |               | DN10894c0g1i1                     | AGA16579.1       | QM protein                                           | 2.000e-111     | <i>Litopenaeus vannamei</i>                  |           |                                   |  |
|               |               | DN20358c0g1i1                     | AFU60735.1       | Relish 1b                                            | 0.000009       | <i>Fenneropenaeus chinensis</i>              |           |                                   |  |
|               |               | B                                 |                  | DN25682c0g1i1                                        | AHB63227.1     | argonaute 2                                  | 6.000e-18 | <i>Penaeus monodon</i>            |  |
|               |               |                                   |                  | DN9649c0g2i2                                         | AAO39550.1     | argonaute 2                                  | 0.000009  | <i>Drosophila melanogaster</i>    |  |
| DN22598c0g1i1 | ACU25384.1    |                                   |                  | crustin 3                                            | 6.000e-15      | <i>Panulirus japonicus</i>                   |           |                                   |  |
| DN23433c0g1i1 | XP001606025.1 |                                   |                  | MIB like protein                                     | 5.000e-7       | <i>Nasonia vitripennis</i>                   |           |                                   |  |
| DN22473c1g1i1 | CCE46010.1    |                                   |                  | putative DEAD-box ATP-dependent RNA helicase*        | 1.000e-8       | <i>Cancer pagurus</i>                        |           |                                   |  |
| DN37858c0g1i1 | CCE46010.1    |                                   |                  | putative DEAD-box ATP-dependent RNA helicase*        | 2.000e-33      | <i>Cancer pagurus</i>                        |           |                                   |  |
| DN5585c0g2i1  | CCE46010.1    |                                   |                  | putative DEAD-box ATP-dependent RNA helicase*        | 2.000e-8       | <i>Cancer pagurus</i>                        |           |                                   |  |
| DN36349c0g1i1 | CCE46010.1    |                                   |                  | putative DEAD-box ATP-dependent RNA helicase*        | 3.000e-83      | <i>Cancer pagurus</i>                        |           |                                   |  |
| DN15339c0g1i1 | ACF28464.1    |                                   |                  | single whey acidic protein domain-containing protein | 0.000008       | <i>Penaeus monodon</i>                       |           |                                   |  |
| DN36978c0g1i1 | BAD99524.1    |                                   |                  | VASA RNA helicase                                    | 0.000003       | <i>Moina macrocopa</i>                       |           |                                   |  |
| DN46355c0g1i1 | BAD99524.1    |                                   |                  | VASA RNA helicase                                    | 0.000002       | <i>Moina macrocopa</i>                       |           |                                   |  |
| DN21315c0g1i1 | BAD99524.1    |                                   |                  | VASA RNA helicase                                    | 0.000001       | <i>Moina macrocopa</i>                       |           |                                   |  |
| DN2900c0g1i1  | BAD99524.1    |                                   |                  | VASA RNA helicase                                    | 1.000e-9       | <i>Moina macrocopa</i>                       |           |                                   |  |
| C             |               |                                   |                  | DN5865c0g2i1                                         | AFK91931.1     | 185/333                                      | 4.000e-7  | <i>Heliocidaris erythrogramma</i> |  |
|               |               | DN4709c0g1i1                      | ACZ26466.1       | Dscam isoform                                        | 1.000e-7       | <i>Litopenaeus vannamei</i>                  |           |                                   |  |
|               |               | DN7879c0g1i1                      | ACC65888.1       | Dscam isoform                                        | 0.000008       | <i>Daphnia pulex</i>                         |           |                                   |  |
|               |               | DN52194c0g2i1                     | ACC65888.1       | Dscam isoform                                        | 0.000002       | <i>Daphnia pulex</i>                         |           |                                   |  |
|               |               | DN22448c0g1i1                     | ACC65888.1       | Dscam isoform                                        | 0.000003       | <i>Daphnia pulex</i>                         |           |                                   |  |
|               |               | DN41253c0g1i1                     | ACC65888.1       | Dscam isoform                                        | 0.000005       | <i>Daphnia pulex</i>                         |           |                                   |  |
|               |               | DN12714c0g1i1                     | AHH86070.1       | Dscam, partial                                       | 8.000e-7       | <i>Cherax quadricarinatus</i>                |           |                                   |  |
|               |               | D                                 |                  | DN16374c0g1i1                                        | AII16489.1     | 26S protease regulatory subunit 10B, partial | 1.000e-7  | <i>Paracyclopsina nana</i>        |  |
| DN11772c0g2i2 | AII16487.1    |                                   |                  | 26S protease regulatory subunit 4, partial           | 2.000e-17      | <i>Paracyclopsina nana</i>                   |           |                                   |  |
| DN6228c0g1i2  | JAJ21823.1    |                                   |                  | brain chitinase and chia                             | 0.000004       | <i>Daphnia magna</i>                         |           |                                   |  |
| DN53134c0g1i1 | JAJ57219.1    |                                   |                  | brain chitinase and chia                             | 6.000e-7       | <i>Daphnia magna</i>                         |           |                                   |  |
| DN12189c0g2i1 | JAJ57471.1    |                                   |                  | brain chitinase and chia                             | 2.000e-7       | <i>Daphnia magna</i>                         |           |                                   |  |
| DN937c0g1i2   | JAJ58565.1    |                                   |                  | brain chitinase and chia                             | 0.000003       | <i>Daphnia magna</i>                         |           |                                   |  |
| DN10624c0g1i2 | JAJ59664.1    |                                   |                  | brain chitinase and chia                             | 0.000002       | <i>Daphnia magna</i>                         |           |                                   |  |
| DN11002c0g2i2 | JAM72468.1    |                                   |                  | brain chitinase and chia                             | 0.000002       | <i>Daphnia magna</i>                         |           |                                   |  |
| DN5768c0g1i1  | JAI92625.1    |                                   |                  | brain chitinase and chia, partial                    | 0.00001        | <i>Daphnia magna</i>                         |           |                                   |  |
| DN5742c0g1i1  | JAN16453.1    |                                   |                  | brain chitinase and chia, partial                    | 2.000e-7       | <i>Daphnia magna</i>                         |           |                                   |  |
| DN38929c0g1i1 | AGT29851.1    |                                   |                  | cathepsin B                                          | 2.000e-25      | <i>Eriocheir sinensis</i>                    |           |                                   |  |
| DN10684c0g1i1 | AFC60662.1    |                                   |                  | chitinase                                            | 2.000e-7       | <i>Pandalopsis japonica</i>                  |           |                                   |  |
| DN43228c0g1i1 | ACG60513.1    |                                   |                  | chitinase 1 precursor                                | 2.000e-38      | <i>Litopenaeus vannamei</i>                  |           |                                   |  |
| DN22703c0g1i1 | ACG60513.1    |                                   |                  | chitinase 1 precursor                                | 0.000001       | <i>Litopenaeus vannamei</i>                  |           |                                   |  |
| DN28844c0g1i1 | ADG22162.1    |                                   |                  | chitinase 1 precursor, partial                       | 1.000e-2       | <i>Penaeus monodon</i>                       |           |                                   |  |
| DN4131c0g1i1  | AHL28109.1    |                                   |                  | chitinase 4                                          | 0.000001       | <i>Macrobrachium nipponense</i>              |           |                                   |  |
| DN10677c0g2i1 | AKP18003.1    |                                   |                  | chitinase 4                                          | 0.000004       | <i>Eriocheir sinensis</i>                    |           |                                   |  |
| DN45465c0g1i1 | XP018011674.1 |                                   |                  | probable chitinase 3 isoform X1*                     | 5.000e-15      | <i>Hyalella azteca</i>                       |           |                                   |  |
| DN7991c0g1i1  | JAL35312.1    |                                   |                  | putative Brain chitinase and chia                    | 3.000e-11      | <i>Daphnia magna</i>                         |           |                                   |  |
| DN10384c0g4i1 | JAN60243.1    |                                   |                  | putative Brain chitinase and chia                    | 1.000e-8       | <i>Daphnia magna</i>                         |           |                                   |  |
| DN9145c0g1i1  | JAN60243.1    | putative Brain chitinase and chia | 3.000e-8         | <i>Daphnia magna</i>                                 |                |                                              |           |                                   |  |
| DN19356c0g1i1 | CDW36302.1    | putative chitinase 3like          | 4.000e-11        | <i>Lepeophtheirus salmonis</i>                       |                |                                              |           |                                   |  |
| DN43573c0g1i1 | CDW49744.1    | putative chitinase 3like          | 1.000e-15        | <i>Lepeophtheirus salmonis</i>                       |                |                                              |           |                                   |  |
| DN138c0g1i1   | AGT03506.1    | zinc proteinase, partial          | 2.000e-7         | <i>Procambarus clarkii</i>                           |                |                                              |           |                                   |  |
| E             |               | DN44455c0g1i1                     | XP391941.2       | agrin - JNK                                          | 1.000e-9       | <i>Apis mellifera</i>                        |           |                                   |  |
|               |               | DN48524c0g1i1                     | XP001608105.1    | CG7586-PA - JAK/STAT                                 | 6.000e-2       | <i>Nasonia vitripennis</i>                   |           |                                   |  |
|               |               | DN50206c0g1i1                     | XP001608105.1    | CG7586-PA - JAK/STAT                                 | 2.000e-9       | <i>Nasonia vitripennis</i>                   |           |                                   |  |
|               |               | DN10723c0g1i1                     | ACYPI004970      | domeless 2 - JAK/STAT                                | 0.000007       | <i>Acyrtosiphon pisum</i>                    |           |                                   |  |
|               |               | DN11057c0g2i1                     | ACYPI004970      | domeless 2 - JAK/STAT                                | 9.000e-7       | <i>Acyrtosiphon pisum</i>                    |           |                                   |  |
|               |               | DN9026c0g1i1                      | ACYPI004970      | domeless 2 - JAK/STAT                                | 5.000e-8       | <i>Acyrtosiphon pisum</i>                    |           |                                   |  |
|               |               | DN6356c0g1i1                      | ACYPI004970      | domeless 2 - JAK/STAT                                | 0.000009       | <i>Acyrtosiphon pisum</i>                    |           |                                   |  |
|               |               | DN1068c0g2i1                      | ACYPI004970      | domeless 2 - JAK/STAT                                | 0.000009       | <i>Acyrtosiphon pisum</i>                    |           |                                   |  |
|               |               | DN1935c0g1i2                      | ACYPI004970      | domeless 2 - JAK/STAT                                | 4.000e-7       | <i>Acyrtosiphon pisum</i>                    |           |                                   |  |
|               |               | DN1015c0g1i1                      | ACYPI004970      | domeless 2 - JAK/STAT                                | 0.000004       | <i>Acyrtosiphon pisum</i>                    |           |                                   |  |
| F             |               | DN2757c0g2i1                      | XP 317365.4      | CLYPE1                                               | 9.000e-7       | <i>Anopheles gambiae</i>                     |           |                                   |  |
|               |               | DN34210c0g1i1                     | NP523776.1       | POSH                                                 | 3.000e-9       | <i>Drosophila melanogaster</i>               |           |                                   |  |
|               |               | DN44408c0g1i1                     | NP523776.1       | POSH                                                 | 9.000e-8       | <i>Drosophila melanogaster</i>               |           |                                   |  |
|               |               | DN9152c0g2i1                      | XP001601412.2    | scarface CG11066-PA                                  | 0.000009       | <i>Nasonia vitripennis</i>                   |           |                                   |  |
|               |               | DN20509c0g1i1                     | NP001123523.1    | sortilin related receptor                            | 2.000e-1       | <i>Nasonia vitripennis</i>                   |           |                                   |  |
|               |               | DN16049c0g1i1                     | NP001123523.1    | sortilin related receptor                            | 2.000e-7       | <i>Nasonia vitripennis</i>                   |           |                                   |  |
|               |               | DN11593c0g4i1                     | XP394101.2       | SP16                                                 | 0.000003       | <i>Apis mellifera</i>                        |           |                                   |  |

row min  row max

|               |               | Contig ID                     | Accession     | Putative Function                                   | E-value                            | Host                                               |                                  |                                 |
|---------------|---------------|-------------------------------|---------------|-----------------------------------------------------|------------------------------------|----------------------------------------------------|----------------------------------|---------------------------------|
| G             |               | 72                            | DN17216c0g1i1 | ADR50356.1                                          | prophenoloxidase                   | 8.000e-26                                          | <i>Oratosquilla oratoria</i>     |                                 |
|               |               | 75                            | DN30261c0g1i1 | CUS19247.1                                          | prophenoloxidase                   | 2.000e-3                                           | <i>Argulus foliaceus</i>         |                                 |
|               |               | 71                            | DN521c0g1i1   | CUS19247.1                                          | prophenoloxidase                   | 1.000e-8                                           | <i>Argulus foliaceus</i>         |                                 |
|               |               | 77                            | DN23270c0g1i1 | AFW98991.1                                          | prophenoloxidase activating enzyme | 3.000e-9                                           | <i>Litopenaeus vannamei</i>      |                                 |
|               |               | 128                           | DN6481c0g1i1  | ABE03741.1                                          | prophenoloxidase activating factor | 9.000e-7                                           | <i>Penaeus monodon</i>           |                                 |
|               |               | 139                           | DN19381c0g1i1 | AAAX48010.1                                         | prophenoloxidase, partial          | 4.000e-7                                           | <i>Macrobrachium rosenbergii</i> |                                 |
|               |               | 131                           | DN22696c0g1i1 | ACP19558.1                                          | prophenoloxidase-activating enzyme | 9.000e-8                                           | <i>Penaeus monodon</i>           |                                 |
|               |               | 130                           | DN45948c0g1i1 | ACP19558.1                                          | prophenoloxidase-activating enzyme | 1.000e-37                                          | <i>Penaeus monodon</i>           |                                 |
|               |               |                               | DN1919c0g1i1  | ACX47133.1                                          | prophenoloxidase-activating factor | 1.000e-16                                          | <i>Portunus trituberculatus</i>  |                                 |
|               |               |                               | DN37487c0g1i1 | ACX47133.1                                          | prophenoloxidase-activating factor | 8.000e-1                                           | <i>Portunus trituberculatus</i>  |                                 |
|               |               | H                             |               | DN52506c0g1i1                                       | AII16502.1                         | catalase, partial                                  | 3.000e-45                        | <i>Paracyclopsina nana</i>      |
|               |               |                               |               | DN33466c0g1i1                                       | XP001606081.2                      | ENSANGP00000006233                                 | 3.000e-9                         | <i>Nasonia vitripennis</i>      |
|               |               |                               |               | DN28036c0g1i1                                       | XP001606463.1                      | ENSANGP00000012893                                 | 1.000e-26                        | <i>Nasonia vitripennis</i>      |
|               |               |                               |               | DN12157c0g2i14                                      | XP001600045.1                      | ENSANGP00000014839                                 | 2.000e-19                        | <i>Nasonia vitripennis</i>      |
|               |               |                               |               | DN48812c0g1i1                                       | AMV91696.1                         | glutathione peroxidase, partial                    | 9.000e-15                        | <i>Portunus trituberculatus</i> |
| DN20685c0g1i1 | NP001166228.1 |                               |               | heat shock cognate 70 protein                       | 6.000e-6                           | <i>Nasonia vitripennis</i>                         |                                  |                                 |
| DN45216c0g1i1 | AII16535.1    |                               |               | heat shock factor-binding protein 1, partial        | 2.000e-14                          | <i>Paracyclopsina nana</i>                         |                                  |                                 |
| DN13761c0g1i1 | AHA61465.1    |                               |               | heat shock protein 70 cognate 3                     | 1.000e-93                          | <i>Eriocheir sinensis</i>                          |                                  |                                 |
| DN51752c0g1i1 | AHA61465.1    |                               |               | heat shock protein 70 cognate 3                     | 5.000e-47                          | <i>Eriocheir sinensis</i>                          |                                  |                                 |
| DN812c0g1i1   | NP001153522.1 |                               |               | heat shock protein cognate 4                        | 1.000e-7                           | <i>Apis mellifera</i>                              |                                  |                                 |
| DN50072c0g1i1 | NP001153522.1 |                               |               | heat shock protein cognate 4                        | 7.000e-27                          | <i>Apis mellifera</i>                              |                                  |                                 |
| DN9138c0g2i1  | NP001153544.1 |                               |               | heat shock protein Hsp70AB-like                     | 9.000e-115                         | <i>Apis mellifera</i>                              |                                  |                                 |
| DN3719c0g2i1  | XP001605191.2 |                               |               | Hsp90                                               | 7.000e-4                           | <i>Nasonia vitripennis</i>                         |                                  |                                 |
| DN46194c0g1i1 | XP001605191.2 |                               |               | Hsp90                                               | 4.000e-12                          | <i>Nasonia vitripennis</i>                         |                                  |                                 |
| DN5391c0g1i1  | XP001605191.2 |                               |               | Hsp90                                               | 6.000e-54                          | <i>Nasonia vitripennis</i>                         |                                  |                                 |
| DN44359c0g1i1 | AII16534.1    |                               |               | Hsp90, partial                                      | 3.000e-44                          | <i>Paracyclopsina nana</i>                         |                                  |                                 |
| DN745c0g1i1   | XP001601130.1 |                               |               | MCG14932                                            | 5.000e-29                          | <i>Nasonia vitripennis</i>                         |                                  |                                 |
| DN17443c0g1i1 | AII16519.1    |                               |               | Mn SOD, partial                                     | 2.000e-1                           | <i>Paracyclopsina nana</i>                         |                                  |                                 |
| I             |               |                               |               | DN53036c0g1i1                                       | ACO15753.1                         | broad-complex core protein isoform 6               | 4.000e-13                        | <i>Caligus clemensi</i>         |
|               |               |                               |               | DN15862c0g1i1                                       | EFX85174.1                         | hindsight transcription factor-like protein        | 3.000e-8                         | <i>Daphnia pulex</i>            |
|               |               | DN28736c0g1i1                 | EFX85174.1    | hindsight transcription factor-like protein         | 3.000e-8                           | <i>Daphnia pulex</i>                               |                                  |                                 |
|               |               | DN42862c0g1i1                 | EFX85174.1    | hindsight transcription factor-like protein         | 2.000e-7                           | <i>Daphnia pulex</i>                               |                                  |                                 |
|               |               | DN20298c0g1i1                 | EFX85174.1    | hindsight transcription factor-like protein         | 0.000007                           | <i>Daphnia pulex</i>                               |                                  |                                 |
|               |               | DN12156c4g2i1                 | AGT03502.1    | transcription factor btf3, partial                  | 4.000e-3                           | <i>Procambarus clarkii</i>                         |                                  |                                 |
| J             |               | DN21796c0g1i1                 | AAM73784.1    | 14-3-3 zeta-like type II, partial                   | 6.000e-27                          | <i>Penaeus monodon</i>                             |                                  |                                 |
|               |               | DN2598c0g2i1                  | AIE56158.1    | calmodulin                                          | 1.000e-39                          | <i>Eriocheir sinensis</i>                          |                                  |                                 |
|               |               | DN54232c0g1i1                 | AIE56158.1    | calmodulin                                          | 3.000e-13                          | <i>Eriocheir sinensis</i>                          |                                  |                                 |
|               |               | DN39127c0g1i1                 | AIE56158.1    | calmodulin                                          | 4.000e-8                           | <i>Eriocheir sinensis</i>                          |                                  |                                 |
|               |               | DN5807c0g1i1                  | JAM77015.1    | carboxyl-terminal PDZ ligand; nitric oxide synthase | 0.000006                           | <i>Daphnia magna</i>                               |                                  |                                 |
|               |               | DN7083c0g1i2                  | JAM77015.1    | carboxyl-terminal PDZ ligand; nitric oxide synthase | 0.00001                            | <i>Daphnia magna</i>                               |                                  |                                 |
|               |               | DN46632c0g2i1                 | AII16522.1    | casein kinase I epsilon, partial                    | 0.000004                           | <i>Paracyclopsina nana</i>                         |                                  |                                 |
|               |               | DN39744c0g1i1                 | AII16510.1    | glutathione S-transferase delta-epsilon 2, partial  | 5.000e-8                           | <i>Paracyclopsina nana</i>                         |                                  |                                 |
|               |               | DN53924c0g1i1                 | AII16513.1    | glutathione S-transferase mu3, partial              | 1.000e-35                          | <i>Paracyclopsina nana</i>                         |                                  |                                 |
|               |               | DN22070c0g1i1                 | ALP46200.1    | nascent polypeptide-associated complex alpha        | 4.000e-27                          | <i>Eriocheir sinensis</i>                          |                                  |                                 |
|               |               | DN52235c0g1i1                 | EFX77274.1    | notch 2                                             | 3.000e-9                           | <i>Daphnia pulex</i>                               |                                  |                                 |
|               |               | DN36402c0g1i1                 | EFX77274.1    | notch 2                                             | 0.000004                           | <i>Daphnia pulex</i>                               |                                  |                                 |
|               |               | DN13388c0g1i1                 | EFX77274.1    | notch 2                                             | 3.000e-7                           | <i>Daphnia pulex</i>                               |                                  |                                 |
|               |               | DN17061c0g1i1                 | AFI39876.1    | phosphoglucose isomerase, partial                   | 4.000e-26                          | <i>Daphnia pulex</i>                               |                                  |                                 |
|               |               | DN28470c0g1i2                 | AII16498.1    | protein phosphatase 1E, partial                     | 6.000e-33                          | <i>Paracyclopsina nana</i>                         |                                  |                                 |
|               |               | DN10981c1g2i1                 | AIT40218.1    | signal transducing adaptor molecule                 | 2.000e-12                          | <i>Rhipicephalus microplus</i>                     |                                  |                                 |
|               |               | DN53686c0g1i1                 | AAN77377.1    | smooth endoplasmic reticulum calcium ATPase         | 2.000e-39                          | <i>Porcellio scaber</i>                            |                                  |                                 |
|               |               | DN51815c0g1i1                 | AAN77377.1    | smooth endoplasmic reticulum calcium ATPase         | 2.000e-11                          | <i>Porcellio scaber</i>                            |                                  |                                 |
| DN180c0g1i1   | AGC96525.1    | thioredoxin 1                 | 5.000e-37     | <i>Scylla paramamosain</i>                          |                                    |                                                    |                                  |                                 |
| DN135c0g1i1   | AIT40206.1    | ubiquitin protein ligase Ubc5 | 4.000e-41     | <i>Rhipicephalus microplus</i>                      |                                    |                                                    |                                  |                                 |
| K             |               | DN11630c1g2i1                 | ADG45306.1    | actin                                               | 0                                  | <i>Marsupenaeus japonicus</i>                      |                                  |                                 |
|               |               | DN12114c1g3i8                 | ADG45308.1    | actin                                               | 3.000e-4                           | <i>Marsupenaeus japonicus</i>                      |                                  |                                 |
|               |               | DN2236c0g1i1                  | AII16466.1    | cadherin, partial                                   | 2.000e-13                          | <i>Paracyclopsina nana</i>                         |                                  |                                 |
|               |               | DN10625c0g1i1                 | P35418.2      | Paramyosin                                          | 4.000e-33                          | <i>Taenia sp.</i>                                  |                                  |                                 |
|               |               | DN20707c0g2i1                 | NP476950.1    | Rac1                                                | 1.000e-56                          | <i>Drosophila melanogaster</i>                     |                                  |                                 |
|               |               | DN24381c0g1i1                 | AMQ26208.1    | Rac1                                                | 4.000e-58                          | <i>Litopenaeus vannamei</i>                        |                                  |                                 |
|               |               | DN20796c0g1i1                 | AII16470.1    | Ras-related protein Rab-2, partial                  | 4.000e-8                           | <i>Paracyclopsina nana</i>                         |                                  |                                 |
|               |               | DN53867c0g1i1                 | ALJ96715.1    | transglutaminase II                                 | 1.000e-12                          | <i>Eriocheir sinensis</i>                          |                                  |                                 |
|               |               | DN170c0g2i1                   | Q25008.1      | tubulin alpha-1 chain                               | 1.000e-68                          | <i>Homarus americanus</i>                          |                                  |                                 |
|               |               | DN26963c0g2i1                 | Q25008.1      | tubulin alpha-1 chain                               | 3.000e-26                          | <i>Homarus americanus</i>                          |                                  |                                 |
|               |               | DN1793c0g1i1                  | Q94572.1      | tubulin alpha-3 chain                               | 6.000e-58                          | <i>Homarus americanus</i>                          |                                  |                                 |
|               |               | DN30282c0g1i1                 | Q94572.1      | tubulin alpha-3 chain                               | 5.000e-31                          | <i>Homarus americanus</i>                          |                                  |                                 |
|               |               | DN29549c0g1i1                 | Q94572.1      | tubulin alpha-3 chain                               | 3.000e-85                          | <i>Homarus americanus</i>                          |                                  |                                 |
|               |               | L                             |               | DN50124c0g1i1                                       | AME17864.1                         | beta-arrestin1                                     | 3.000e-8                         | <i>Marsupenaeus japonicus</i>   |
| DN36972c0g1i1 | AGL46986.1    |                               |               | C-type lectin                                       | 9.000e-2                           | <i>Procambarus clarkii</i>                         |                                  |                                 |
| DN940c0g1i1   | AGC96521.1    |                               |               | C-type lectin, partial                              | 6.000e-31                          | <i>Scylla paramamosain</i>                         |                                  |                                 |
| DN11857c0g2i3 | AII16543.1    |                               |               | cubilin, partial                                    | 0.000005                           | <i>Paracyclopsina nana</i>                         |                                  |                                 |
| DN54008c0g1i1 | AFI39732.1    |                               |               | enolase, partial                                    | 6.000e-56                          | <i>Daphnia parvula</i>                             |                                  |                                 |
| DN44552c0g1i1 | AGT03509.1    |                               |               | ferritin, partial                                   | 4.000e-1                           | <i>Procambarus clarkii</i>                         |                                  |                                 |
| DN20843c0g1i1 | CAB41634.1    |                               |               | iron regulatory protein 1-like protein              | 7.000e-9                           | <i>Pacifastacus leniusculus</i>                    |                                  |                                 |
| DN25964c0g1i1 | AII16462.1    |                               |               | PDZ and LIM domain protein 1, partial               | 4.000e-8                           | <i>Paracyclopsina nana</i>                         |                                  |                                 |
| DN2192c0g2i1  | XP018012592.1 |                               |               | scavenger receptor class B member 1-like*           | 1.000e-12                          | <i>Hyalella azteca</i>                             |                                  |                                 |
| M             |               |                               |               | DN50607c0g1i1                                       | XP018024334.1                      | cell cycle and apoptosis regulator protein 1-like* | 7.000e-17                        | <i>Hyalella azteca</i>          |
|               |               | DN32791c0g1i1                 | XP018024334.1 | cell cycle and apoptosis regulator protein 1-like*  | 2.000e-33                          | <i>Hyalella azteca</i>                             |                                  |                                 |
|               |               | DN18405c0g1i1                 | JAN89210.1    | cell division cycle protein                         | 0.000002                           | <i>Daphnia magna</i>                               |                                  |                                 |
|               |               | DN11227c1g2i1                 | XP018025155.1 | cell division cycle protein 16 homolog*             | 9.000e-14                          | <i>Hyalella azteca</i>                             |                                  |                                 |
