# Supplementary material for: Gene expression of benthic amphipods (genus: Diporeia) in relation to a circular ssDNA virus across two Laurentian Great Lakes
Source: PeerJ. 2017 Sep 26;5:e3810. doi: 10.7717/peerj.3810 (PMC5621510; doi:10.7717/peerj.3810)
Supplement: Supplemental Information 9 — Reference sequences fitting both keyword 1 and 2 (e.g. “Crustacea” + “Toll like receptor”) were collected and collated from the NCBI protein repository as a BLAST database to identify transcriptome contigs affiliated with putative immune functions. [file peerj-05-3810-s009.docx]

| **Keyword 1** | **Keyword 2** |
| --- | --- |
| *Crustacea* + | Immune |
| Toll like receptor |
| Toll |
| TLR |
| Prophenoloxidase |
| STAT |
| JNK |
| JAK |
| JAK/STAT |
| IMD |
| Humoral |
| Cell cycle |
| Antiviral |
| Antimicrobial peptides |
| Caspase |
| Chitinase |
| Nitric oxide synthase |
| DSCAM |
| Argonaute |
| Dicer |
| Dorsal |
| Gemini |
| IMD |
| MyD88 |
| STAT |
| Cactus |
| Pelle |
| Relish |
| Tube |
| c-type lectin |
| GNBP |
| Galectin |
| PGRP |
| TEP |
| Scavenger a |
